# Supplementary material for: Effect of Air Exposure-Induced Hypoxia on Neurotransmitters and Neurotransmission Enzymes in Ganglia of the Scallop Azumapecten farreri
Source: MDPI journal article supplement (doi:10.3390/ijms23042027), 2022-02-11
Supplement: s1 [file s1]

## Supplementary Materials

### CHAT-lir neurons in CPG and PG ganglia during air exposure-induced hypoxia

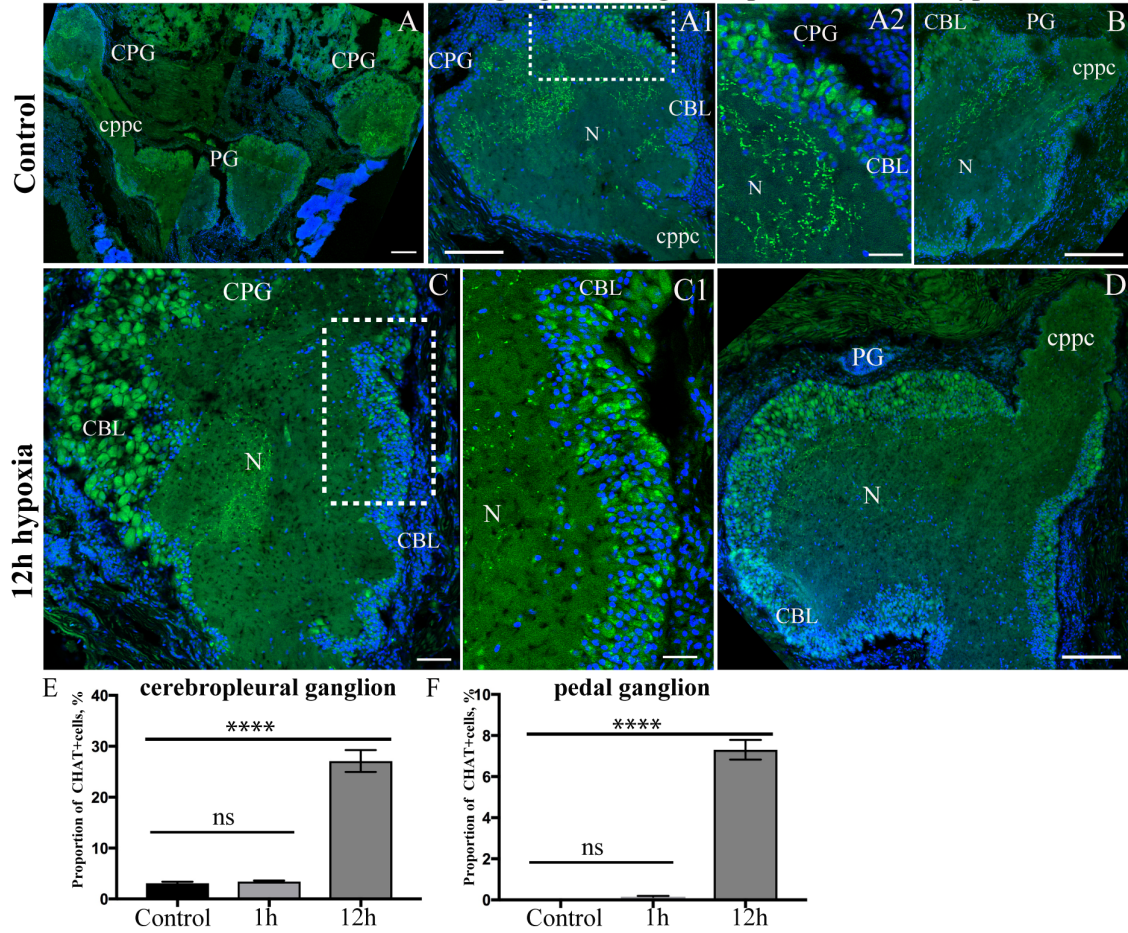

**Figure S1.** Choline acetyltransferase-lir distribution in control cerebropleural and pedal ganglia and after hypoxia exposure. The distribution of CHAT-lir in the CPG (A, A1, A2) and PG (B) under control conditions and after 12 h of hypoxia exposure (C, C1, D). Quantification of CHAT-lir cells in the CPG (E) and PG (F) under control conditions and after hypoxia (1 h and 12 h). Data analysis was performed using GraphPad Prism 7; the data are expressed as mean  $\pm$  SEM, and statistical significance was calculated using one-way ANOVA tests. Multiple comparisons were performed using the Dunnett's many-to-one test (normoxia group was set as the control). Regarding the proportion of CHAT+ cells in CPG:  $F = 119$ ,  $P = 0.9774$  (ns), and  $P < 0.0001$  (\*\*\*\*),  $R^2 = 0.9084$ ,  $F$  (DFn, DFd):  $F(2, 24) = 119$ . Regarding the proportion of CHAT+ cells in PG:  $F = 225.1$ ,  $P = 0.8991$  (ns), and  $P < 0.0001$  (\*\*\*\*),  $R^2 = 0.9494$ ,  $F$  (DFn, DFd):  $F(2, 24) = 225.1$ . The letter designations are as follows: CPG, cerebropleural ganglia; PG, pedal ganglia; cppc, cerebral-pleural-pedal connectives; N, neuropil; CBL, cell body layer. Bars: A, 500  $\mu$ m; A1, B, and D, 100  $\mu$ m; A2, C, and C1, 50  $\mu$ m.

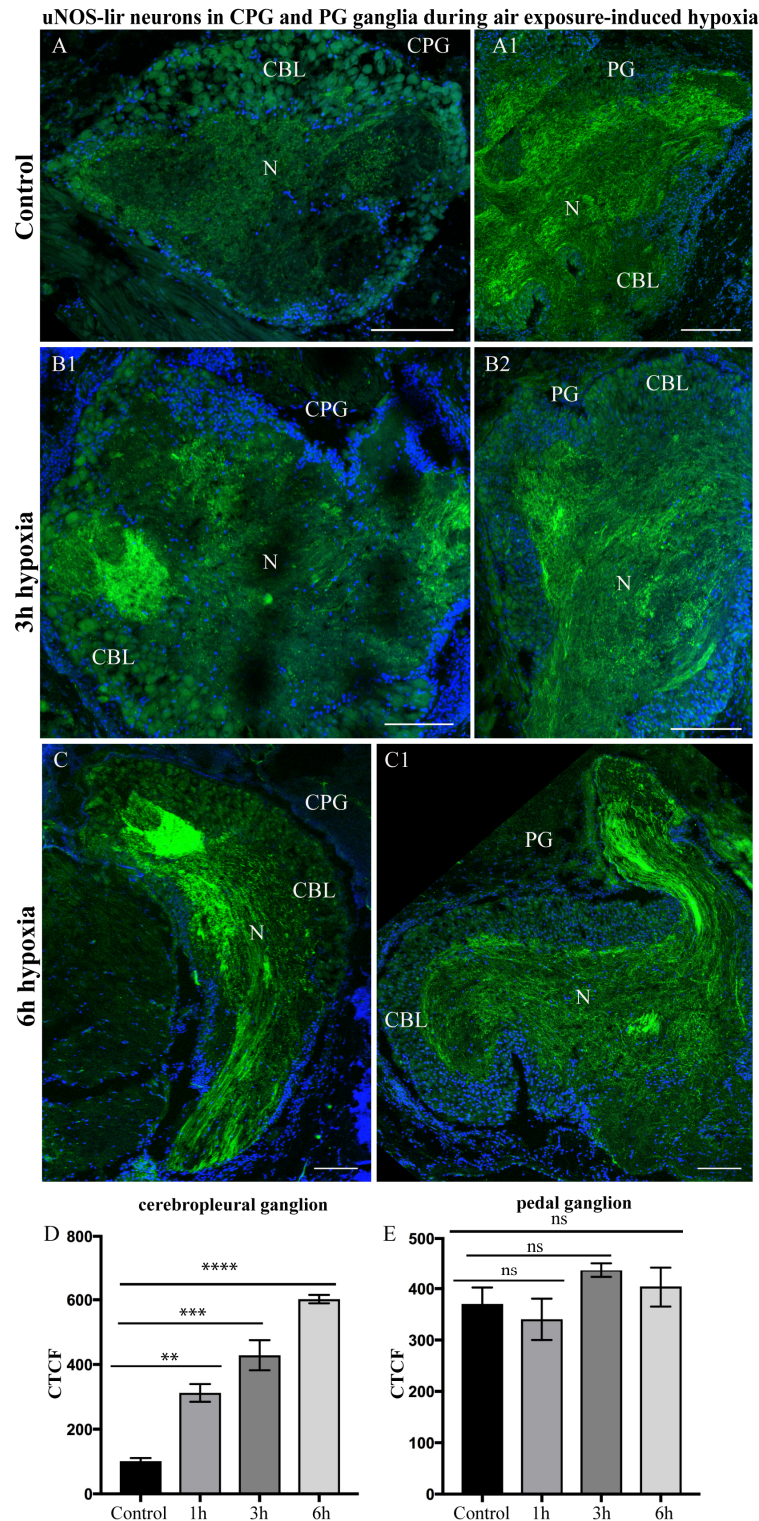

**Figure S2.** uNOS-lir distribution in control cerebropleural and pedal ganglia and after hypoxia exposure. The distribution of uNOS-lir neurons in control CPG (A), PG (A1), and after 1 h (B1, B2) and 6 h of hypoxia exposure (C, C1). (E) Quantification of uNOS-lir in the CPG (D) and PG (E). The letter designations are as follows: CPG, cerebropleural ganglia; PG, pedal ganglia; N, neuropil; CBL, cell body layer. Data analysis was performed using GraphPad Prism 7; the data are expressed as mean  $\pm$  SEM, and statistical significance was calculated using one-way ANOVA tests. Multiple comparisons were performed using the Dunnett's many-to-one test (normoxia group was set as the control). With regard to the CTFC in the CPG ganglia after hypoxia,  $F = 55.61$ ,  $P = 0.0019$  (\*\*),  $P = 0.004$  (\*\*\*),  $P = 0.0001$ ,  $R$  square = 0.7958,  $F$

(DFn, DFd): F (2, 24) = 46.78. For the PG after hypoxia, P = 0.2622 (ns), R square = 0.3764, F (DFn, DFd): F (3, 8) = 1.61.  
Bars: A, B1, C, and C1, 100  $\mu\text{m}$ ; A1 and B2, 50  $\mu\text{m}$ .
